# Supplementary material
Source: PubMed Central journal article supplement (PMC122332)

**A**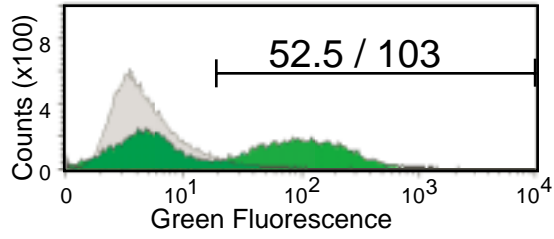**B**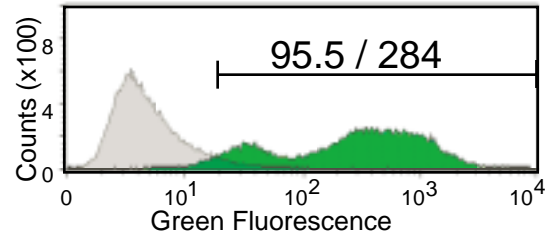**C**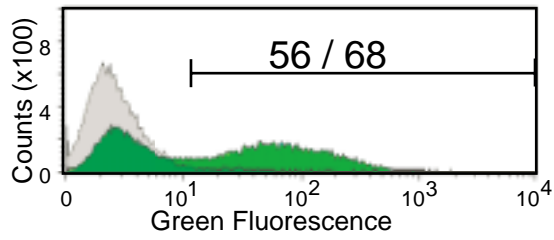**D**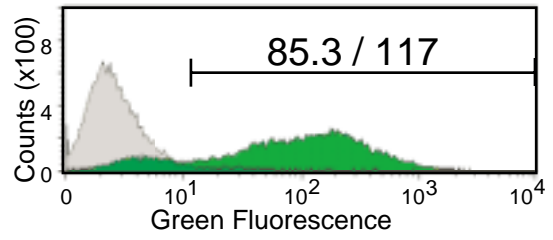**E**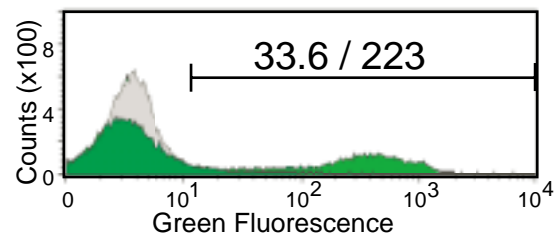**F**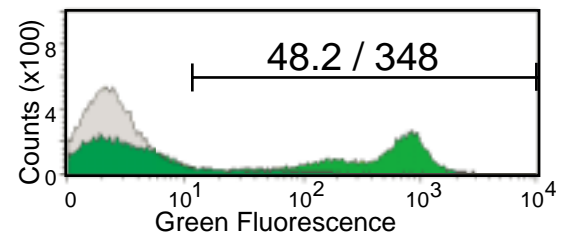

Supplement: pnas_99_4_2140__2.pdf [file pnas_99_4_2140__2.pdf]
